# Supplementary material for: De novo transcriptome sequencing and analysis revealed the molecular basis of rapid fat accumulation by black soldier fly (Hermetia illucens, L.) for development of insectival biodiesel
Source: Biotechnol Biofuels. 2019 Aug 9;12:194. doi: 10.1186/s13068-019-1531-7 (PMC6688347; doi:10.1186/s13068-019-1531-7)
Supplement: Supplementary file 12 — Additional file 12: Table S6. The designed primers of the key enzymes involved in lipid metabolism for qRT-PCR. [file 13068_2019_1531_MOESM12_ESM.xlsx]

## Sheet: Sheet1
Table S6. The designed primers of the key enzymes involved in lipid metabolism for qRT-PCR
Abbreviation	Enzymes name	Primer forward	Primer reverse	Amplicon size (bp)
ACC	Acetyl-CoA Carboxylase	AACAGTGGTGCTCGTATC	TGGCTCGTCTTCATCTTC	180
FASN	Fatty acid synthase	AAACCTCCAATCTTCTTCGTGC	CAAGTGGTGCCTCTTCTGTGC	118
ACSBG	Long-chain-fatty-acid--CoA ligase ACSBG	CAATCATTTCGTATTTGCCACTG	CGACAGCATCTTCTTCACTCCC	133
DGAT1	diacylglycerol O-acyltransferase 1	TCGACGGAACGTGTCTTGGT	ATGGGTGCTTCGGCTGTATG	144
